# Supplementary material for: Measuring Tumour Imatinib Concentrations in Gastrointestinal Stromal Tumours: Relevant or Redundant?
Source: MDPI journal article supplement (doi:10.3390/cancers15112875), 2023-05-23
Supplement: s1 [file s1]

**Supplementary Table S1**

| Patient                                                                    | Tumour tissue concentration imatinib (ng/mg wet tissue) |                    |                    |                    |                        | Trough concentration imatinib (ng/mg plasma) |
|----------------------------------------------------------------------------|---------------------------------------------------------|--------------------|--------------------|--------------------|------------------------|----------------------------------------------|
|                                                                            | Primary tumour                                          |                    |                    |                    | Metastasis             |                                              |
|                                                                            | <i>Core</i>                                             | <i>Middle part</i> | <i>Periphery</i>   | <i>Mean</i>        | <i>Mean</i>            |                                              |
| 1                                                                          | 19.0                                                    | 16.4               | 17.0               | 17.5               | -                      | 1.3                                          |
| 2                                                                          | 2.0                                                     | 2.7                | 4.1                | 2.9                | -                      | 2.2                                          |
| 3                                                                          | 3.9                                                     | 1.6                | 3.4                | 3.0                | -                      | 0.9                                          |
| 4                                                                          | 3.6                                                     | 3.7                | 2.6                | 3.3                | -                      | 0.9                                          |
| 5                                                                          | 17.0                                                    | 24.3               | 36.5               | 25.9               | -                      | 0.9                                          |
| 6                                                                          | 6.9                                                     | 5.0                | 4.6                | 5.5                | -                      | 0.9                                          |
| 7<br><i>primary metastasis</i>                                             | 1.0<br>-                                                | 0.4<br>-           | 6.9<br>-           | 2.8<br>-           | -<br>6.8               | 1.2                                          |
| 8<br><i>primary metastasis 4a</i><br><i>metastasis 4b</i><br><i>nodule</i> | 0.9<br>-<br>-<br>-                                      | 1.0<br>-<br>-<br>- | 1.1<br>-<br>-<br>- | 1.0<br>-<br>-<br>- | -<br>2.1<br>1.4<br>1.7 | 0.7                                          |

<LLOQ below the lowest limit of quantification
